# Supplementary material
Source: Springer Nature journal article supplement (https://www.springermedizin.de/resource/supplementary/13049_2013_706_MOESM4_ESM.pdf/9666940)

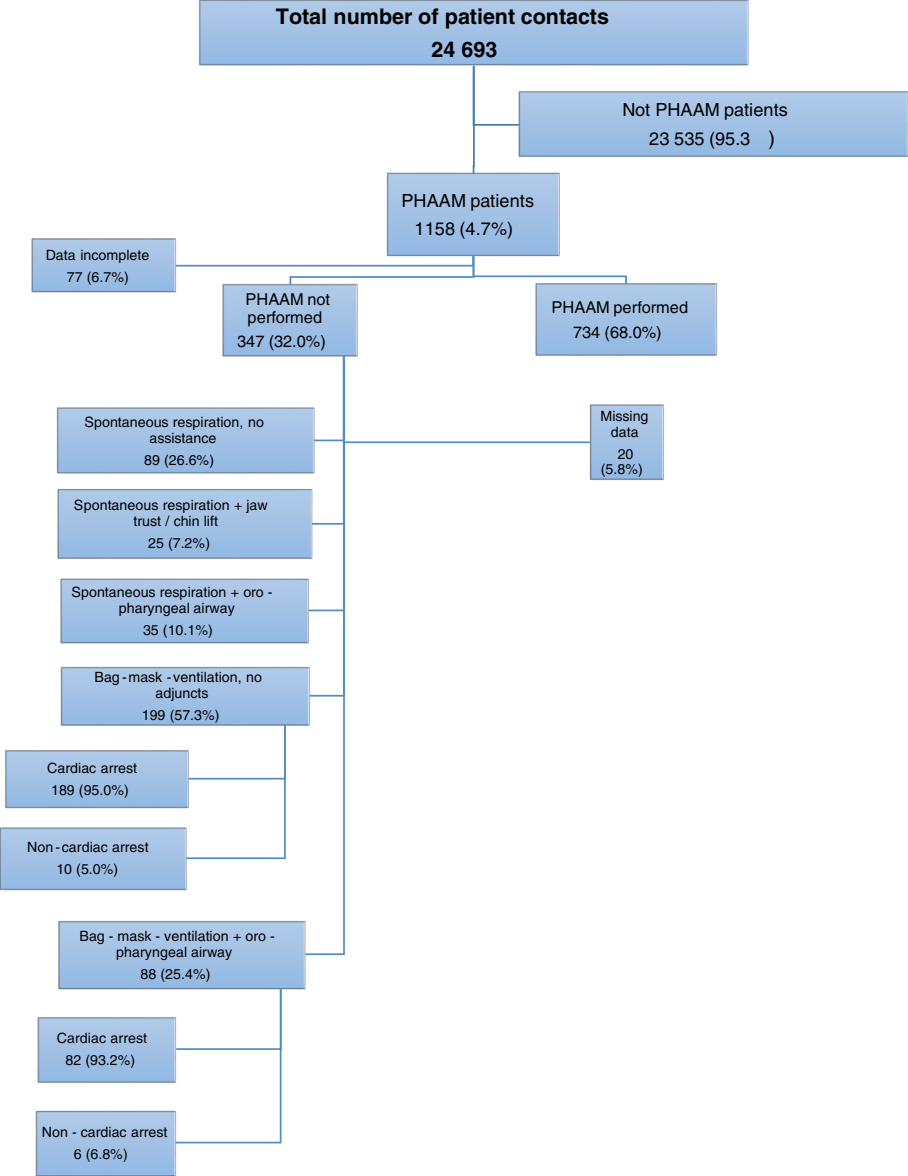

Supplement: MOESM4 [file 9666940]
